# Supplementary material for: In situ synthesis and excellent photocatalytic activity of tiny Bi decorated bismuth tungstate nanorods
Source: Royal Society of Chemistry journal article supplement (doi:10.1039/c5ra15406e), 2015-01-01
Supplement: c5ra15406e1.pdf [file c5ra15406e1.pdf]

## Electronic Supplementary Information

### In Situ Synthesis and Excellent Photocatalytic activity of tiny Bi Decorated Bismuth tungstate nanorods

Shi-Yu Lu, Ya-Nan Yu, Shu-Juan Bao\* and Sheng-hui Liao

#### Preparation of BWO-220H

The sample was first prepared by the same process as Bi/Bismuth tungstate just using H<sub>2</sub>O instead of ethylene glycol as solvent, and then kept at 220 °C for 20 h.

**Fig S1** XRD pattern of BWO-220H

**Fig S2** XPS spectra of Bi4f and W4f for BWO-220H

**Fig S3** FESEM image of BWO-220H

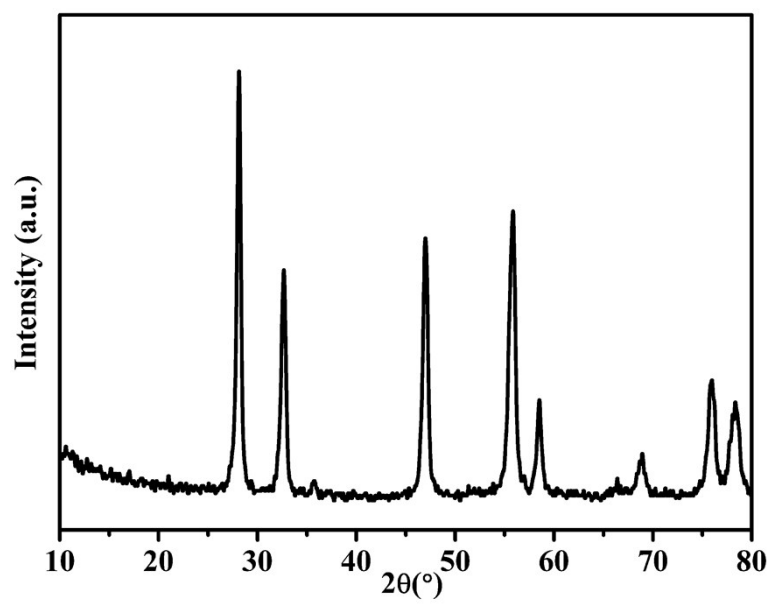

Fig S1 XRD pattern of BWO-220H

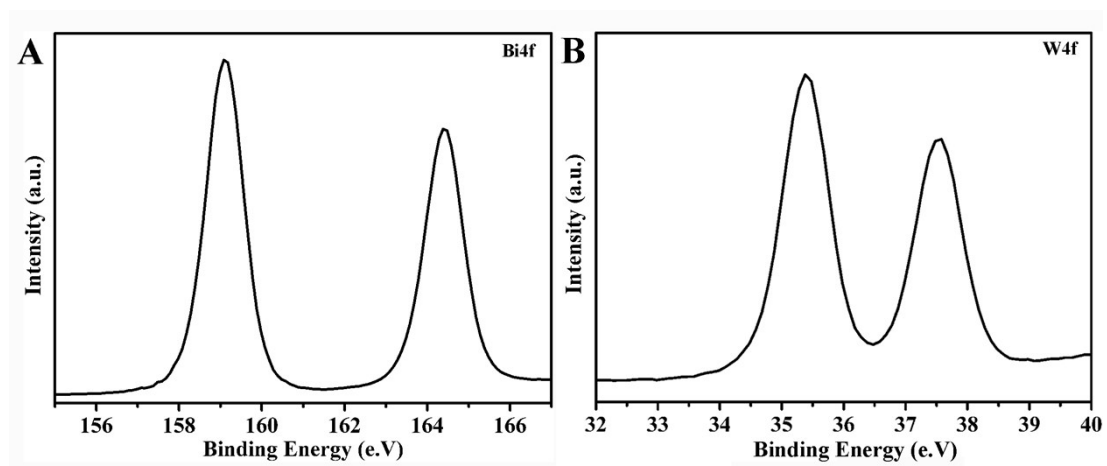

Fig.S2 XPS spectra of Bi4f and W4f for BWO-220H

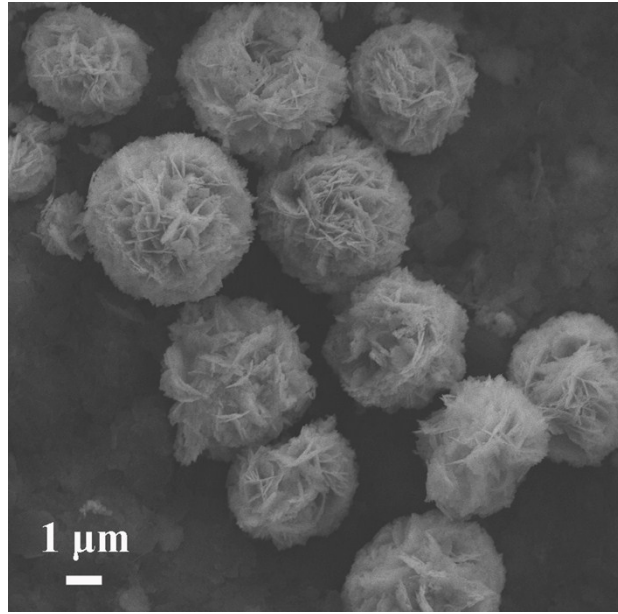

**Fig.S3** FESEM image of BWO-220H
